# Supplementary material for: Adipocyte-like signature in ovarian cancer minimal residual disease identifies metabolic vulnerabilities of tumor-initiating cells
Source: PubMed Central journal article supplement (PMC8262282; doi:10.1172/jci.insight.147929), 2021-06-08
Supplement: jciinsight-6-147929-s099.pdf [file jciinsight-6-147929-s099.pdf]

## Supplementary Figures

### **Supplementary Figure 1. The Oxford Ovarian Cancer Predict Chemotherapy Response (OXO-PCR) study: a patient cohort.**

(A) Diagram shows the LCM and bulk RNA-seq pipelines including the multiple quality control steps to avoid the contamination from surrounding non-cancer tissue.

(B) LCM images of the 6 MRD samples captured from the Exceptional Responders (n=3). Scale bars, 50  $\mu\text{m}$ .

**A**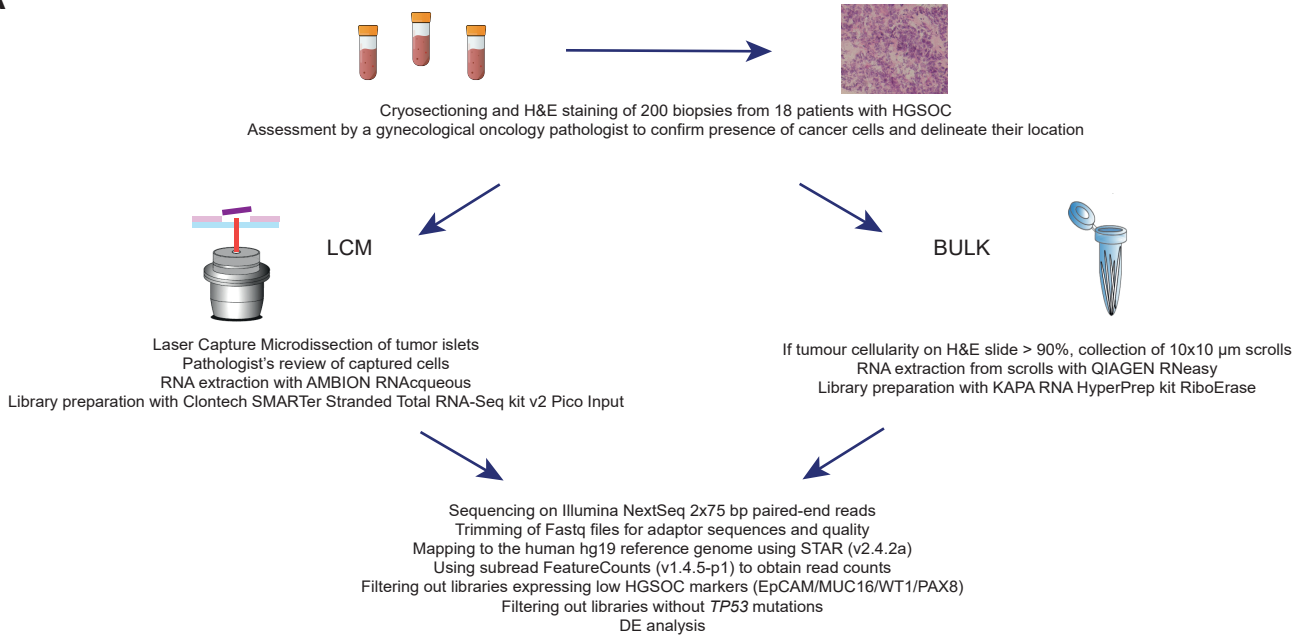**B**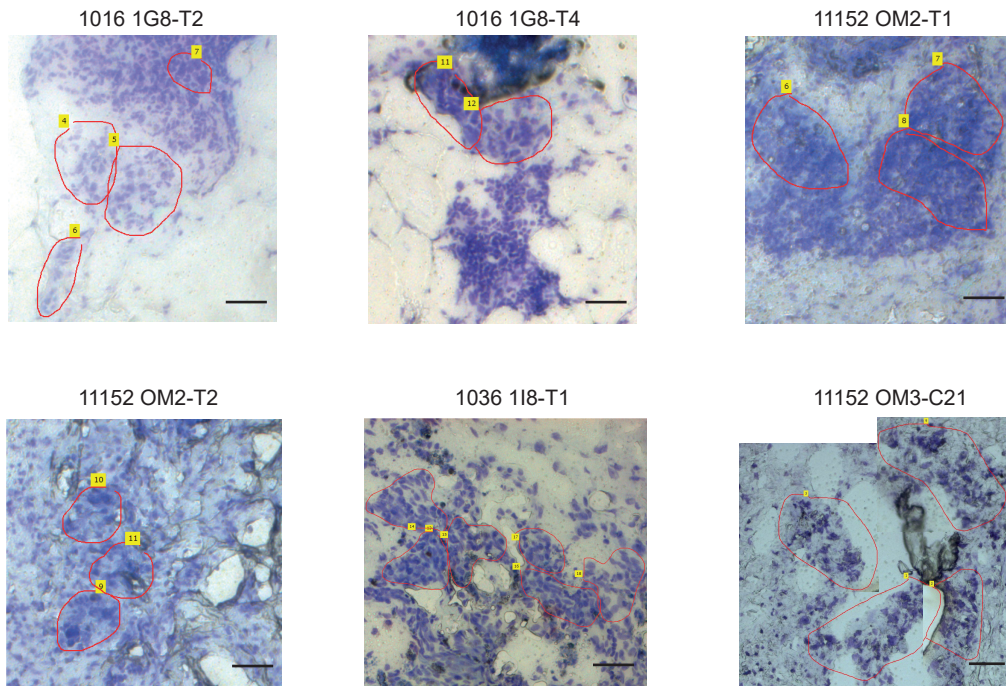

**Supplementary Figure 2. Pseudotime and t-SNE analysis reveal limited intra-patient heterogeneity.**

(A) Plot shows the unsupervised pseudotime analysis of the OXO-PCR pre-chemotherapy sample set and the TCGA HGSOC cohort.

(B) t-SNE plot of the entire OXO-PCR dataset following batch correction.

(C) Dot plot shows the main pathways enriched among the pseudotime-dependent genes. Differential expression analysis was performed along the pseudotime gradient independently of chemotherapy effect.

**A**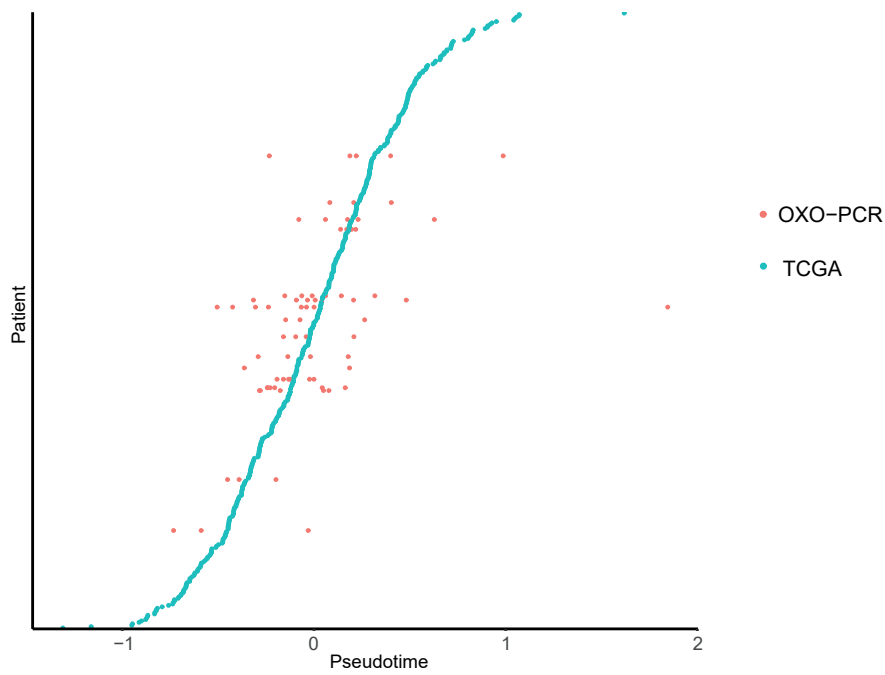**B**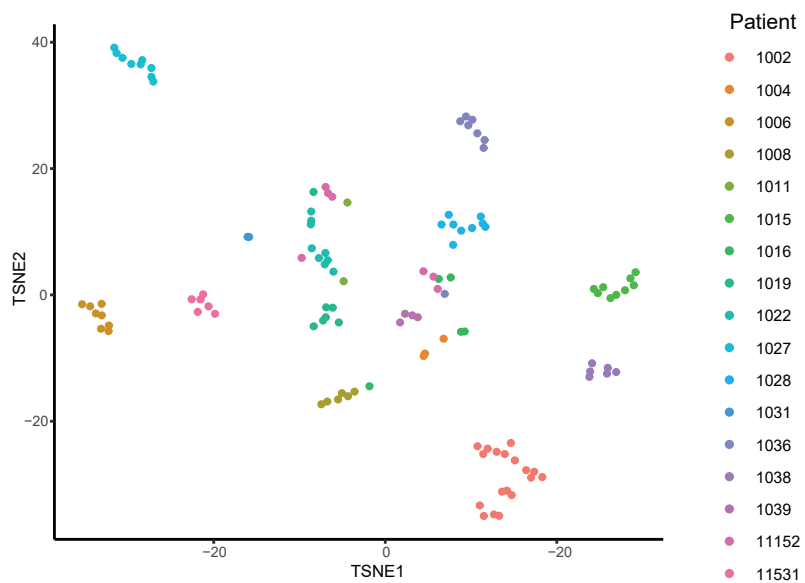**C**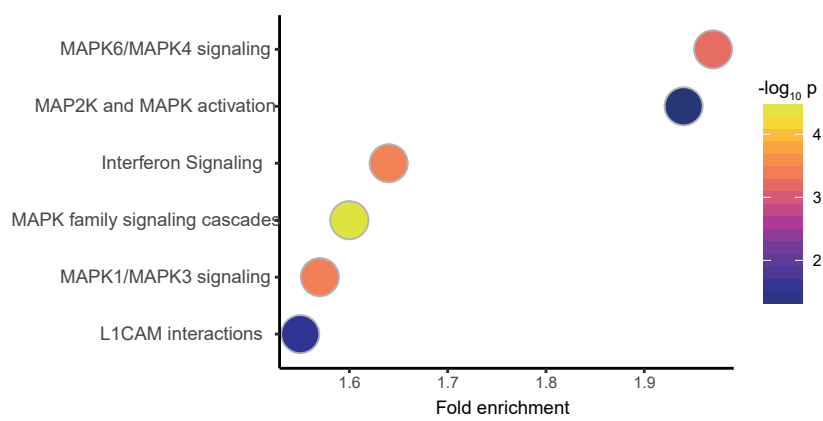



**Supplementary Figure 3. HGSOC MRD cells exhibit adipocyte-like and TICs transcriptomic signatures.**

(A) Dot plot shows the expression of HGSOC marker genes in the exceptional responders before and after chemotherapy.

(B) Heatmap shows three selections of differentially expressed genes for the exceptional responder patient 1016: lipid metabolism genes, ABC transporters and dormancy genes.

(C) Heatmap shows the lipid metabolism genes differentially expressed in the exceptional responder patient 1036.

(D) Graphs show expression levels of lipid metabolism genes in the exceptional responder patient 11152.

(E) Quantitative real-time PCR of two lipid metabolism genes in the exceptional responders before and after chemotherapy.

(F) Graphs show expression levels of genes from the adipocyte-like signature in poor and exceptional responders after treatment.

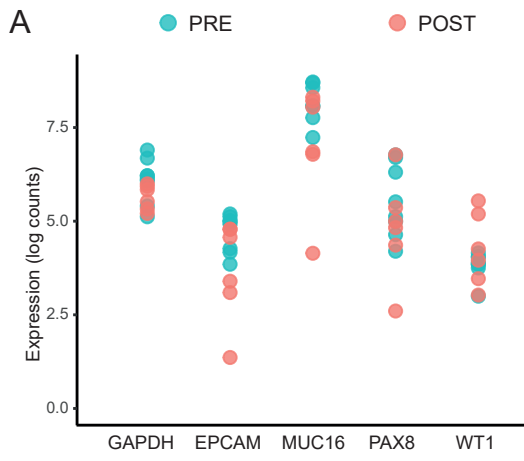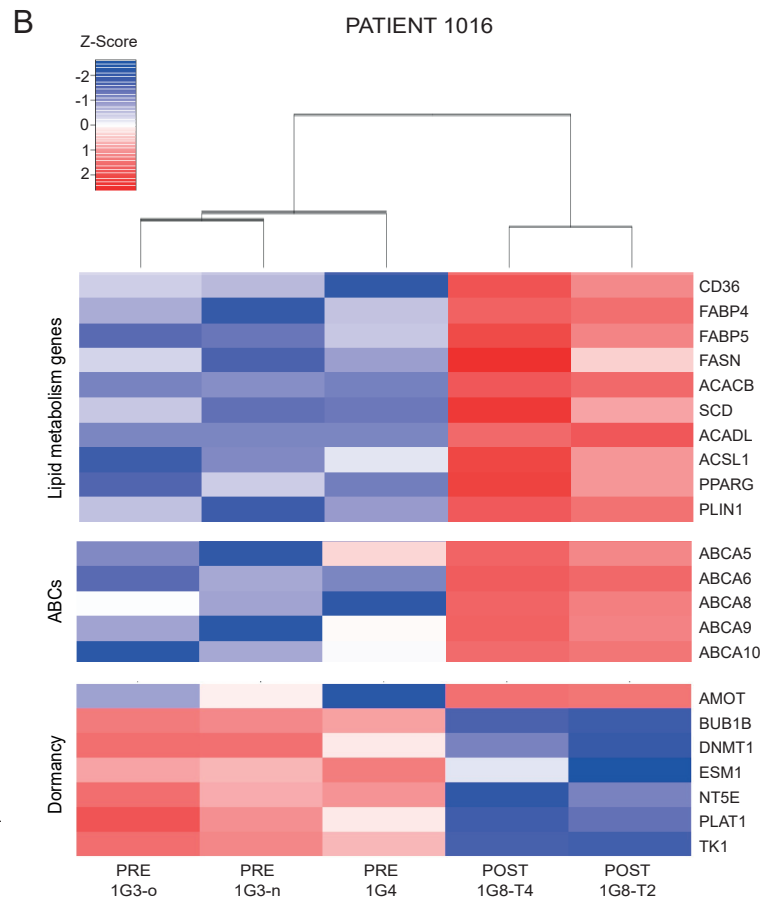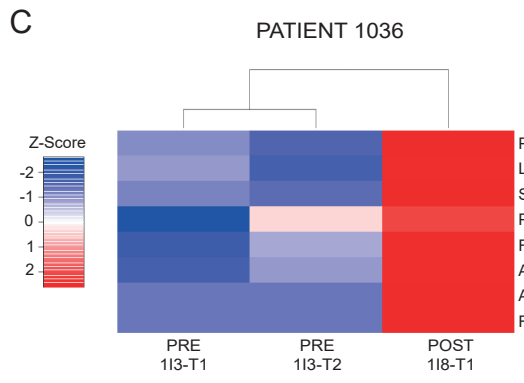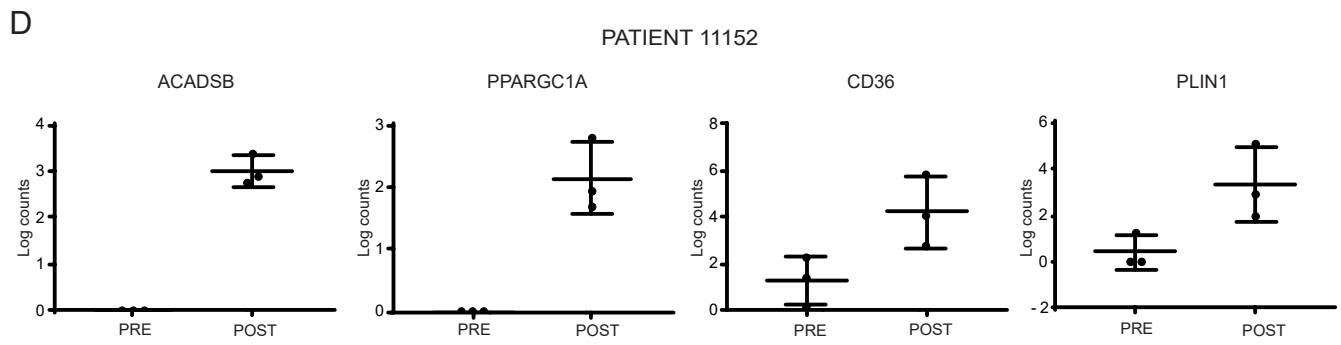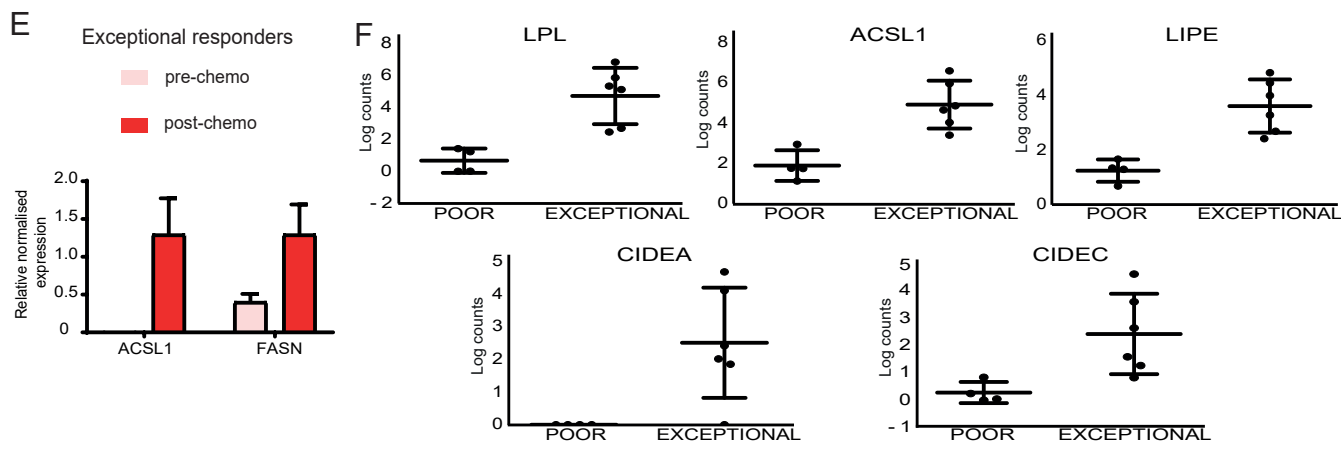

**Supplementary Figure 4. The transcriptome of MRD cells resembles differentiated adipocytes.**

Bar plots show the transcriptional changes occurring during the differentiation of fibroblast-like 3T3-L1 cells into adipocytes.

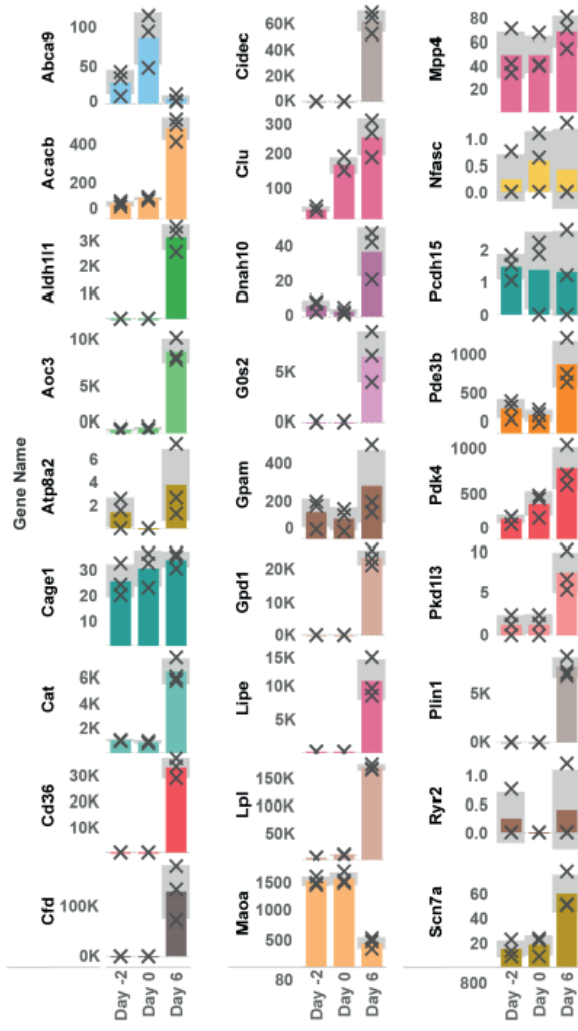

### **Supplementary Figure 5. MRD cells show mesenchymal characteristics**

Stacked bar plot visualizes the deconvolution result of the whole OXO-PCR dataset. Colors of the bars denote the 5 cell states as shown in the legend.

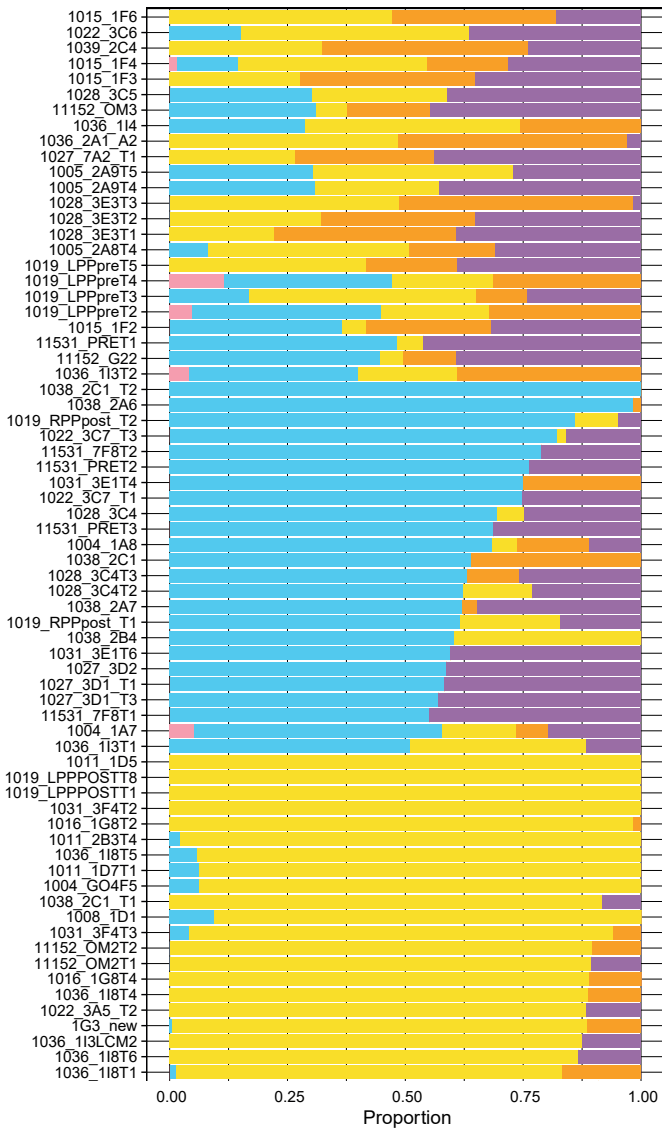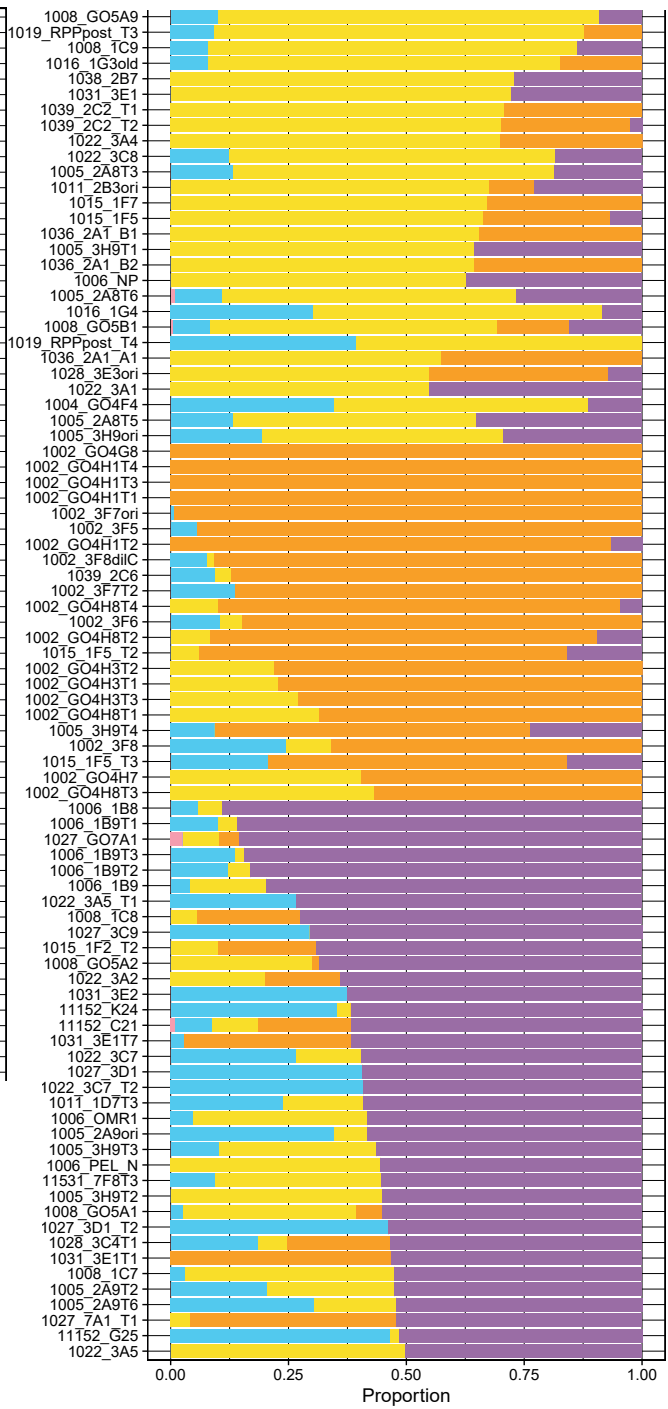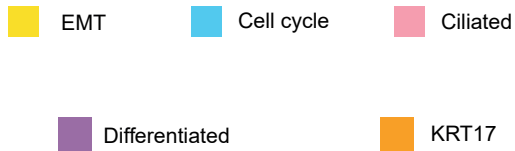

**Supplementary Figure 6. MRD-mimic cells in vitro are sensitive to inhibitors targeting fatty acid oxidation.**

(A) Representative images show OVCAR5 and OVCAR8 cells before and after carboplatin treatment.

(B) Quantitative real-time PCR of three EMT drivers in KURAMOCHI, OVCAR5 and OVCAR8 cells before and after carboplatin treatment.

(C) Quantitative real-time PCR of PPARA and FASN mRNA in OVCAR5 MRD-mimic cells recovered in regular medium for different amounts of time.

(D-E) Representative pattern of OCR as a function of time (min) normalized to DNA content in untreated, end of treatment and MRD-mimic OVCAR5 cells (D). Bar plots show means  $\pm$  SEM basal (top) and maximal (bottom) OCR from 3 independent experiments.

(F) Representative images of colony forming assays for OVCAR5 and OVCAR8 untreated and MRD-mimic cells incubated with CPT1 inhibitors (see methods).

(G) Bar plots show lipid concentration and composition in OVCAR5 and OVCAR8 cell lines before and after treatment with carboplatin.

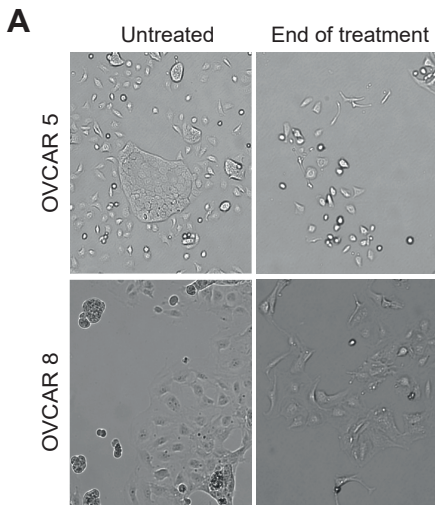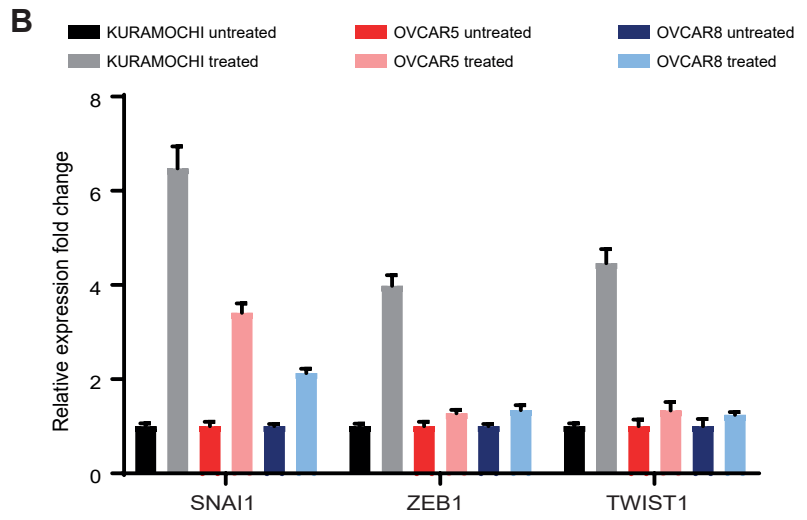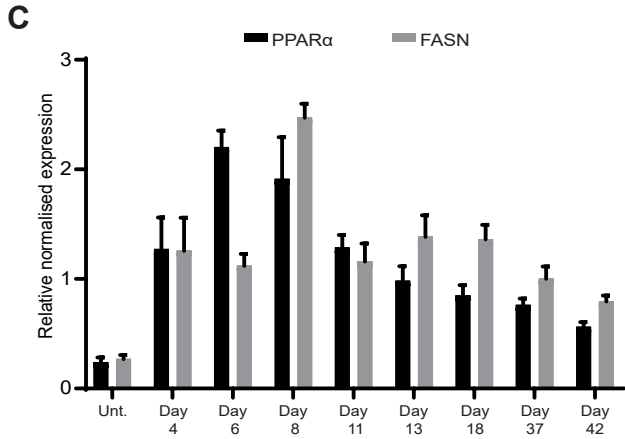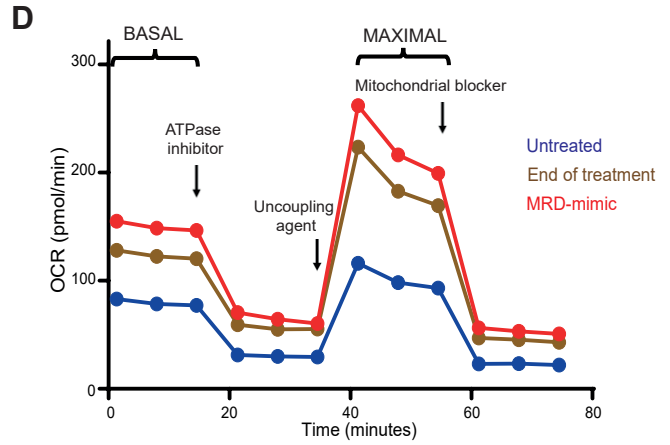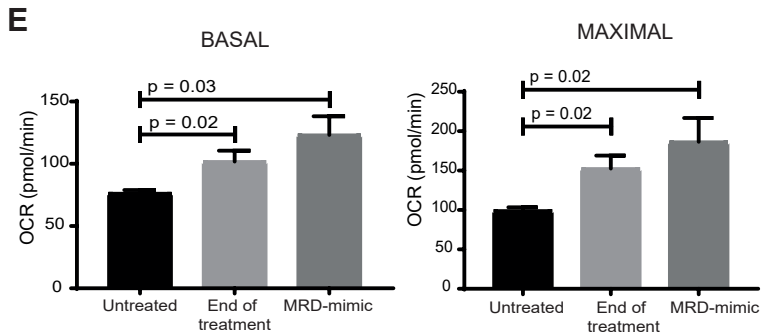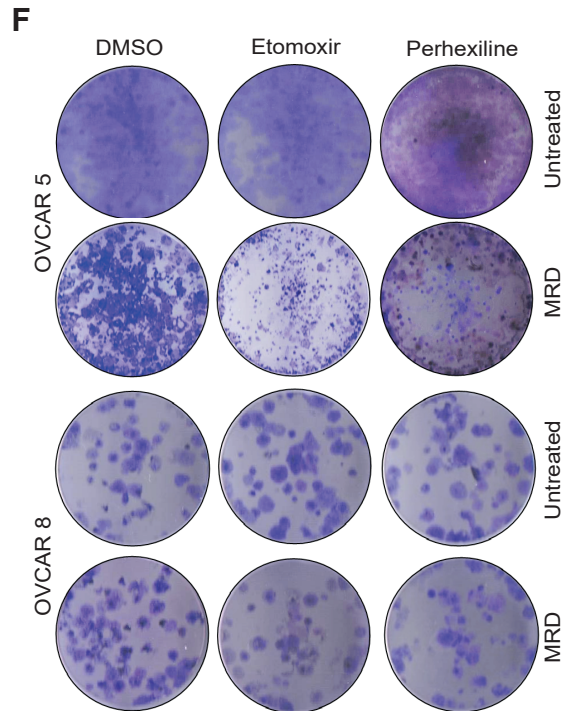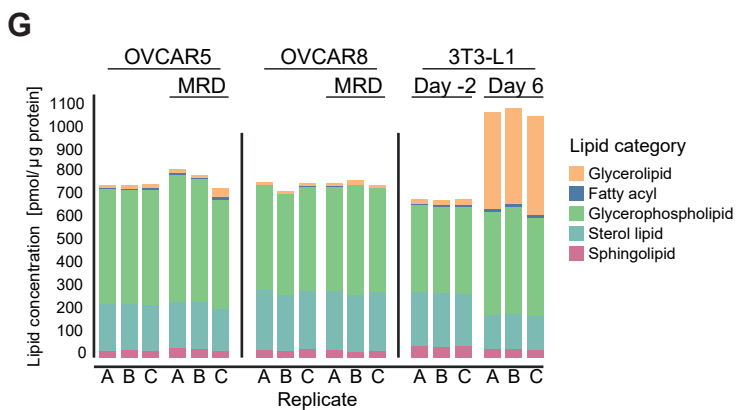



**Supplementary Figure 7. Fatty acid oxidation is a general mechanism of resistance in MRD that is independent from the cytotoxic agent.**

(A) Quantitative real-time PCR of FAO genes in KURAMOCHI cells with SIRT1 knockdown upon olaparib treatment. The graph represents fold change of mean expression relative to siNonTargeting DMSO controls from n=1.

(B) Graphs show dose response to olaparib treatment with and without etomoxir in colony forming assays. SKOV3 cells were treated with 80  $\mu$ M etomoxir and OVCAR8 with 60  $\mu$ M etomoxir. A comparison of fits (F test) was performed on n=3 independent experiments.

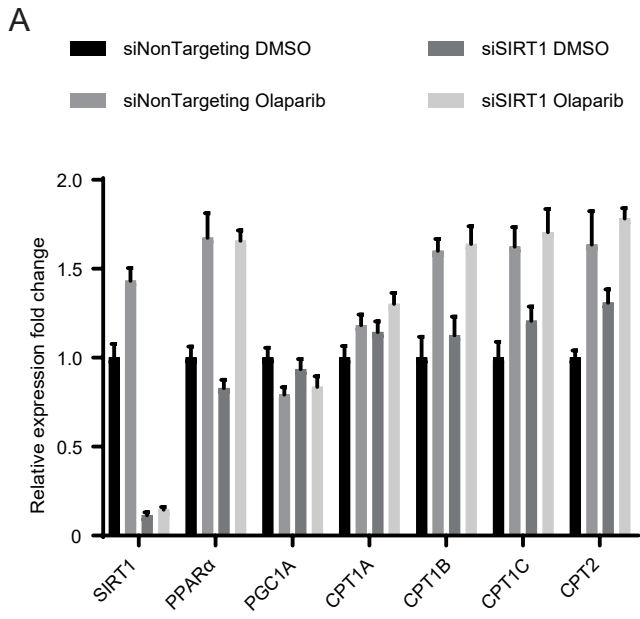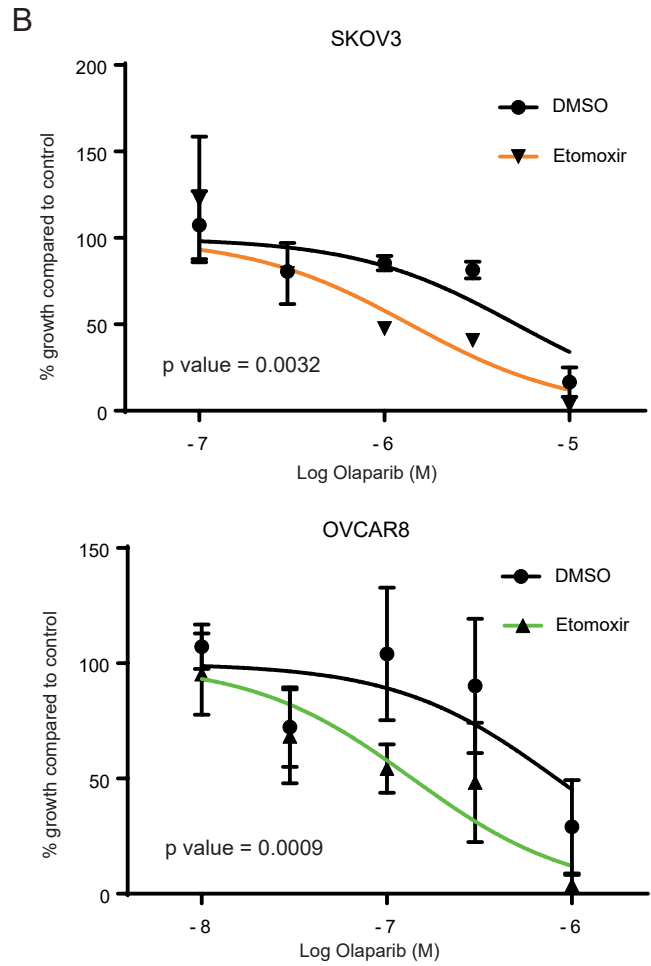

## **Table list**

**Table S1. Patient information of OXO-PCR subjects (see Excel file).**

**Table S2. Pseudotime analysis and DE genes (see Excel file).**

**Table S3. DE genes between “Exceptional Responders” pre-chemo and “Exceptional Responders” post-chemo (see Excel file).**

**Table S4. DE genes between “Exceptional Responders” post-chemo and “Poor Responders” post-chemo (see Excel file).**

## **Supplementary video**

A video demonstrating complete clinical response in a patient (1016) who was one of the exceptional responders. Note the surgical clip in the post-chemotherapy video. The clip was used to mark the site from which a biopsy was obtained prior to chemotherapy and to guide selecting the post-chemotherapy biopsy site.
